# Supplementary material
Source: publisher site journal article supplement (https://www.dovepress.com/article/468881)
Supplement: Supplementary file 1 [file get_supplementary_file.php]

**Telepharmacy versus Face-to-Face Approach in Providing Inhaler Technique Training Service: A Non-inferiority Assessment Among German Pharmacy Students**

**Supplementary Materials**

**Supplementary material S1. Analytical Checklist for Inhaler type Aerosol**

Participant code: \_\_\_\_\_ Date: \_\_\_\_\_ Examiner: \_\_\_\_\_

OSCE-Nr. \_\_\_\_ Communication medium: Face-2-Face  Telepharmacy

| <b>OSCE Checklist (Aerosol)</b>                                                                                                                                                                                                                                                                                                                |                  |                      |                |
|------------------------------------------------------------------------------------------------------------------------------------------------------------------------------------------------------------------------------------------------------------------------------------------------------------------------------------------------|------------------|----------------------|----------------|
| <b>Steps to be carried out and checked</b>                                                                                                                                                                                                                                                                                                     | <b>Fulfilled</b> | <b>Not fulfilled</b> | <b>Remarks</b> |
| <b>Station 1: General Preparation and Introduction (5 P.)</b>                                                                                                                                                                                                                                                                                  |                  |                      |                |
| 1.1 The examinee greets and identifies the patient.                                                                                                                                                                                                                                                                                            |                  |                      |                |
| 1.2 The examinee checks whether the patient is eligible for the clinical pharmacy service (Inhaler technique training). <ul style="list-style-type: none"> <li>• <i>Newly prescribed</i></li> <li>• <i>Device change</i></li> <li>• <i>Last training ≥ 1 year ago and no participation in the Disease-Management-Programm (DMP)</i></li> </ul> |                  |                      |                |
| 1.3 The examinee obtains the patient's consent.                                                                                                                                                                                                                                                                                                |                  |                      |                |
| 1.4 The examinee explains the stepwise procedure.                                                                                                                                                                                                                                                                                              |                  |                      |                |
| 1.5 The examinee explains the importance of the correct inhaler technique.                                                                                                                                                                                                                                                                     |                  |                      |                |
| <b>Station 2: Inhaler technique demonstration and practice (13 P.)</b>                                                                                                                                                                                                                                                                         |                  |                      |                |
| The examinee instructs the patient by demonstrating how to.....                                                                                                                                                                                                                                                                                | <b>Fulfilled</b> | <b>Not fulfilled</b> | <b>Remarks</b> |
| 2.1 ... verify the condition of the inhaler (Functionality, completeness, cleanliness).                                                                                                                                                                                                                                                        |                  |                      |                |
| 2.2 ... shake the inhaler.                                                                                                                                                                                                                                                                                                                     |                  |                      |                |
| 2.3 ... remove the cap of the inhaler.                                                                                                                                                                                                                                                                                                         |                  |                      |                |
| 2.4 ... hold the device and maintain body posture in the correct position (standing or sitting straight).                                                                                                                                                                                                                                      |                  |                      |                |
| 2.5 ... exhale completely sideways.                                                                                                                                                                                                                                                                                                            |                  |                      |                |
| 2.6 ... Put the mouthpiece between teeth, close the lips to form a good seal, and keep the head upright.                                                                                                                                                                                                                                       |                  |                      |                |
| 2.7 ... press the canister and inhale at the same time.                                                                                                                                                                                                                                                                                        |                  |                      |                |
| 2.8 ... inhale slowly and deeply.                                                                                                                                                                                                                                                                                                              |                  |                      |                |
| 2.9 ... hold breath for 5-10 seconds after inhalation.                                                                                                                                                                                                                                                                                         |                  |                      |                |
| 2.10 ... slowly exhale from the mouth or nose and away from the mouthpiece.                                                                                                                                                                                                                                                                    |                  |                      |                |
| 2.11 ... close the device with the cap.                                                                                                                                                                                                                                                                                                        |                  |                      |                |

**Telepharmacy versus Face-to-Face Approach in Providing Inhaler Technique Training Service: A Non-inferiority Assessment Among German Pharmacy Students**

**Supplementary Materials**

|                                                                                                                                                                                                               |           |               |         |
|---------------------------------------------------------------------------------------------------------------------------------------------------------------------------------------------------------------|-----------|---------------|---------|
| 2.12 The examinee provides additional information (rinsing mouth, brushing teeth, drinking water, repeating all the steps in case of an additional dose, and storage of the device).                          |           |               |         |
| 2.13 The examinee asks the patient to demonstrate all the steps.                                                                                                                                              |           |               |         |
| <b>Station 3: Communication skills, critical error identification &amp; documentation (8 P.)</b>                                                                                                              |           |               |         |
|                                                                                                                                                                                                               | Fulfilled | Not fulfilled | Remarks |
| 3.1 The examinee maintains sufficient eye contact during the counseling session.                                                                                                                              |           |               |         |
| 3.2 The examinee pays attention to appropriate non-verbal communication (gestures, facial expressions, etc.).                                                                                                 |           |               |         |
| 3.3 The examinee pays attention to comprehensible expression.                                                                                                                                                 |           |               |         |
| 3.4 The examinee ensures the patient's understanding.                                                                                                                                                         |           |               |         |
| 3.5 The examinee remains attentive during the inhaler technique demonstration by the patient.                                                                                                                 |           |               |         |
| 3.6 The examinee responds to critical inhaler technique errors made by the patient. <ul style="list-style-type: none"> <li>• <i>Not shaking the inhaler.</i></li> <li>• <i>Not holding breath.</i></li> </ul> |           |               |         |
| 3.7 The examinee responds to the patient's questions.                                                                                                                                                         |           |               |         |
| 3.8 The examinee completes the necessary documentation.                                                                                                                                                       |           |               |         |

**Supplementary material S2. Analytical Checklist for Inhaler type Breezhaler**

Participant code: \_\_\_\_\_ Date: \_\_\_\_\_ Examiner: \_\_\_\_\_

OSCE-Nr. \_\_\_\_ Communication medium: Face-2-Face  Telepharmacy

| <b>OSCE Checklist (Breezhaler)</b>                                                                                                                                                                                                  |           |               |         |
|-------------------------------------------------------------------------------------------------------------------------------------------------------------------------------------------------------------------------------------|-----------|---------------|---------|
| <b>Steps to be carried out and checked</b>                                                                                                                                                                                          | Fulfilled | Not fulfilled | Remarks |
| <b>Station 1: General Preparation and Introduction (5 P.)</b>                                                                                                                                                                       |           |               |         |
| 1.1 The examinee greets and identifies the patient.                                                                                                                                                                                 |           |               |         |
| 1.2 The examinee checks whether the patient is eligible for the clinical pharmacy service (Inhaler technique training). <ul style="list-style-type: none"> <li>• <i>Newly prescribed</i></li> <li>• <i>Device change</i></li> </ul> |           |               |         |

**Telepharmacy versus Face-to-Face Approach in Providing Inhaler Technique Training Service: A Non-inferiority Assessment Among German Pharmacy Students**

**Supplementary Materials**

|                                                                                                                                                                                      |           |               |         |
|--------------------------------------------------------------------------------------------------------------------------------------------------------------------------------------|-----------|---------------|---------|
| <ul style="list-style-type: none"> <li><i>Last training ≥ 1 year ago and no participation in the Disease-Management-Programm (DMP)</i></li> </ul>                                    |           |               |         |
| 1.3 The examinee obtains the patient's consent.                                                                                                                                      |           |               |         |
| 1.4 The examinee explains the stepwise procedure.                                                                                                                                    |           |               |         |
| 1.5 The examinee explains the importance of the correct inhaler technique.                                                                                                           |           |               |         |
| <b>Station 2: Inhaler technique demonstration and practice (13 P.)</b>                                                                                                               |           |               |         |
| The examinee instructs the patient by demonstrating how to.....                                                                                                                      | Fulfilled | Not fulfilled | Remarks |
| 2.1 ... verify the condition of the inhaler (Functionality, completeness, cleanliness).                                                                                              |           |               |         |
| 2.2 ... remove the cap of the inhaler.                                                                                                                                               |           |               |         |
| 2.3 ... set the device ready for use (insert capsule).                                                                                                                               |           |               |         |
| 2.4...Prepare the dose by piercing the capsule.                                                                                                                                      |           |               |         |
| 2.5 ...hold the device and maintain body posture in the correct position (standing or sitting straight).                                                                             |           |               |         |
| 2.6 ... exhale completely sideways.                                                                                                                                                  |           |               |         |
| 2.7 ... Put the mouthpiece between the teeth, close the lips to form a good seal, and keep the head upright.                                                                         |           |               |         |
| 2.8 ... Inhale deeply and rapidly                                                                                                                                                    |           |               |         |
| 2.9 ... hold breath for 5-10 seconds after inhalation.                                                                                                                               |           |               |         |
| 2.10 ... slowly exhale from the mouth or nose and away from the mouthpiece.                                                                                                          |           |               |         |
| 2.11 ... Remove the capsule and close the device.                                                                                                                                    |           |               |         |
| 2.12 The examinee provides additional information (rinsing mouth, brushing teeth, drinking water, repeating all the steps in case of an additional dose, and storage of the device). |           |               |         |
| 2.13 The examinee asks the patient to demonstrate all the steps.                                                                                                                     |           |               |         |
| <b>Station 3: Communication skills, critical error identification &amp; documentation (8 P.)</b>                                                                                     |           |               |         |
|                                                                                                                                                                                      | Fulfilled | Not fulfilled | Remarks |
| 3.1 The examinee maintains sufficient eye contact during the counseling session.                                                                                                     |           |               |         |
| 3.2 The examinee pays attention to appropriate non-verbal communication (gestures, facial expressions, etc.).                                                                        |           |               |         |
| 3.3 The examinee pays attention to comprehensible expression.                                                                                                                        |           |               |         |

**Telepharmacy versus Face-to-Face Approach in Providing Inhaler Technique Training Service: A Non-inferiority Assessment Among German Pharmacy Students**

**Supplementary Materials**

|                                                                                                                                                                                                                                                                       |  |  |  |
|-----------------------------------------------------------------------------------------------------------------------------------------------------------------------------------------------------------------------------------------------------------------------|--|--|--|
| 3.4 The examinee ensures the patient's understanding.                                                                                                                                                                                                                 |  |  |  |
| 3.5 The examinee remains attentive during the inhaler technique demonstration by the patient.                                                                                                                                                                         |  |  |  |
| 3.6 The examinee responds to critical inhaler technique errors made by the patient. <ul style="list-style-type: none"> <li>• Not "filling" the Breezhaler with the medication capsule or pressing the side buttons.</li> <li>• Exhalation into the device.</li> </ul> |  |  |  |
| 3.7 The examinee responds to the patient's questions.                                                                                                                                                                                                                 |  |  |  |
| 3.8 The examinee completes the necessary documentation.                                                                                                                                                                                                               |  |  |  |

**Supplementary material S3. Analytical Checklist for Inhaler type Autohaler**

Participant code: \_\_\_\_\_ Date: \_\_\_\_\_ Examiner: \_\_\_\_\_

OSCE-Nr. \_\_\_\_ Communication medium: Face-2-Face  Telepharmacy

| <b>OSCE Checklist (Autohaler)</b>                                                                                                                                                                                                                                                                                                              |                  |                      |                |
|------------------------------------------------------------------------------------------------------------------------------------------------------------------------------------------------------------------------------------------------------------------------------------------------------------------------------------------------|------------------|----------------------|----------------|
| <b>Steps to be carried out and checked</b>                                                                                                                                                                                                                                                                                                     | <b>Fulfilled</b> | <b>Not fulfilled</b> | <b>Remarks</b> |
| <b>Station 1: General Preparation and Introduction (5 P.)</b>                                                                                                                                                                                                                                                                                  |                  |                      |                |
| 1.1 The examinee greets and identifies the patient.                                                                                                                                                                                                                                                                                            |                  |                      |                |
| 1.2 The examinee checks whether the patient is eligible for the clinical pharmacy service (Inhaler technique training). <ul style="list-style-type: none"> <li>• <i>Newly prescribed</i></li> <li>• <i>Device change</i></li> <li>• <i>Last training ≥ 1 year ago and no participation in the Disease-Management-Programm (DMP)</i></li> </ul> |                  |                      |                |
| 1.3 The examinee obtains the patient's consent.                                                                                                                                                                                                                                                                                                |                  |                      |                |
| 1.4 The examinee explains the stepwise procedure.                                                                                                                                                                                                                                                                                              |                  |                      |                |
| 1.5 The examinee explains the importance of the correct inhaler technique.                                                                                                                                                                                                                                                                     |                  |                      |                |
| <b>Station 2: Inhaler technique demonstration and practice (14 P.)</b>                                                                                                                                                                                                                                                                         |                  |                      |                |
| The examinee instructs the patient by demonstrating how to.....                                                                                                                                                                                                                                                                                | <b>Fulfilled</b> | <b>Not fulfilled</b> | <b>Remarks</b> |
| 2.1 ... verify the condition of the inhaler (Functionality, completeness, cleanliness).                                                                                                                                                                                                                                                        |                  |                      |                |
| 2.2 ... shake the inhaler.                                                                                                                                                                                                                                                                                                                     |                  |                      |                |
| 2.3 ... remove the cap of the inhaler.                                                                                                                                                                                                                                                                                                         |                  |                      |                |

**Telepharmacy versus Face-to-Face Approach in Providing Inhaler Technique Training Service: A Non-inferiority Assessment Among German Pharmacy Students**

**Supplementary Materials**

|                                                                                                                                                                                                                 |           |               |         |
|-----------------------------------------------------------------------------------------------------------------------------------------------------------------------------------------------------------------|-----------|---------------|---------|
| 2.4 ... set the inhaler ready for use (push lever up).                                                                                                                                                          |           |               |         |
| 2.5 ... hold the device and maintain body posture in the correct position (standing or sitting straight).                                                                                                       |           |               |         |
| 2.6 ... exhale completely sideways.                                                                                                                                                                             |           |               |         |
| 2.7 ... Put the mouthpiece between teeth, close the lips to form a good seal, and keep the head upright.                                                                                                        |           |               |         |
| 2.8 ... activate the spray by inhalation and keep breathing in after the click is heard                                                                                                                         |           |               |         |
| 2.9 ... Inhale slowly, deeply, and for a long time.                                                                                                                                                             |           |               |         |
| 2.10 ... hold breath for 5-10 seconds after inhalation.                                                                                                                                                         |           |               |         |
| 2.11 ... slowly exhale from the mouth or nose and away from the mouthpiece.                                                                                                                                     |           |               |         |
| 2.12 ... push the lever down and close the device with the cap.                                                                                                                                                 |           |               |         |
| 2.13 The examinee provides additional information (rinsing mouth, brushing teeth, drinking water, repeating all steps in case of an additional dose, and storage of the device).                                |           |               |         |
| 2.14 The examinee asks the patient to demonstrate all the steps.                                                                                                                                                |           |               |         |
| <b>Station 3: Communication skills, critical error identification &amp; documentation (8 P.)</b>                                                                                                                |           |               |         |
|                                                                                                                                                                                                                 | Fulfilled | Not fulfilled | Remarks |
| 3.1 The examinee maintains sufficient eye contact during the counseling session.                                                                                                                                |           |               |         |
| 3.2 The examinee pays attention to appropriate non-verbal communication (gestures, facial expressions, etc.).                                                                                                   |           |               |         |
| 3.3 The examinee pays attention to comprehensible expression.                                                                                                                                                   |           |               |         |
| 3.4 The examinee ensures the patient's understanding.                                                                                                                                                           |           |               |         |
| 3.5 The examinee remains attentive during the inhaler technique demonstration by the patient.                                                                                                                   |           |               |         |
| 3.6 The examinee responds to critical inhaler technique errors made by the patient. <ul style="list-style-type: none"> <li>• <i>Not shaking the Autohaler.</i></li> <li>• <i>Not holding breath.</i></li> </ul> |           |               |         |
| 3.7 The examinee responds to the patient's questions.                                                                                                                                                           |           |               |         |
| 3.8 The examinee completes the necessary documentation.                                                                                                                                                         |           |               |         |

**Telepharmacy versus Face-to-Face Approach in Providing Inhaler Technique Training Service: A Non-inferiority Assessment Among German Pharmacy Students**

**Supplementary Materials**

**Supplementary material S4. Analytical Checklist for Inhaler type Diskus**

Participant code: \_\_\_\_\_ Date: \_\_\_\_\_ Examiner: \_\_\_\_\_

OSCE-Nr. \_\_\_\_ Communication medium: Face-2-Face  Telepharmacy

| <b>OSCE Checklist (Diskus)</b>                                                                                                                                                                                                                                                                                                                 |                  |                      |                |
|------------------------------------------------------------------------------------------------------------------------------------------------------------------------------------------------------------------------------------------------------------------------------------------------------------------------------------------------|------------------|----------------------|----------------|
| <b>Steps to be carried out and checked</b>                                                                                                                                                                                                                                                                                                     | <b>Fulfilled</b> | <b>Not fulfilled</b> | <b>Remarks</b> |
| <b>Station 1: General Preparation and Introduction (5 P.)</b>                                                                                                                                                                                                                                                                                  |                  |                      |                |
| 1.1 The examinee greets and identifies the patient.                                                                                                                                                                                                                                                                                            |                  |                      |                |
| 1.2 The examinee checks whether the patient is eligible for the clinical pharmacy service (Inhaler technique training). <ul style="list-style-type: none"> <li>• <i>Newly prescribed</i></li> <li>• <i>Device change</i></li> <li>• <i>Last training ≥ 1 year ago and no participation in the Disease-Management-Programm (DMP)</i></li> </ul> |                  |                      |                |
| 1.3 The examinee obtains the patient's consent.                                                                                                                                                                                                                                                                                                |                  |                      |                |
| 1.4 The examinee explains the stepwise procedure.                                                                                                                                                                                                                                                                                              |                  |                      |                |
| 1.5 The examinee explains the importance of the correct inhaler technique.                                                                                                                                                                                                                                                                     |                  |                      |                |
| <b>Station 2: Inhaler technique demonstration and practice (12 P.)</b>                                                                                                                                                                                                                                                                         |                  |                      |                |
| The examinee instructs the patient by demonstrating how to.....                                                                                                                                                                                                                                                                                | <b>Fulfilled</b> | <b>Not fulfilled</b> | <b>Remarks</b> |
| 2.1 ... verify the condition of the inhaler (Functionality, completeness, cleanliness).                                                                                                                                                                                                                                                        |                  |                      |                |
| 2.2 ... remove the cap of the inhaler.                                                                                                                                                                                                                                                                                                         |                  |                      |                |
| 2.3 ... set the device ready for use (loading by pressing the lever).                                                                                                                                                                                                                                                                          |                  |                      |                |
| 2.4 ... hold the device and maintain body posture in the correct position (standing or sitting straight).                                                                                                                                                                                                                                      |                  |                      |                |
| 2.5 ... exhale completely sideways.                                                                                                                                                                                                                                                                                                            |                  |                      |                |
| 2.6 ... Put the mouthpiece between the teeth, close the lips to form a good seal, and keep the head upright.                                                                                                                                                                                                                                   |                  |                      |                |
| 2.7 ... Inhale deeply and rapidly                                                                                                                                                                                                                                                                                                              |                  |                      |                |
| 2.8 ... hold breath for 5-10 seconds after inhalation.                                                                                                                                                                                                                                                                                         |                  |                      |                |
| 2.9 ... slowly exhale from the mouth or nose and away from the mouthpiece.                                                                                                                                                                                                                                                                     |                  |                      |                |
| 2.10 ... close the device.                                                                                                                                                                                                                                                                                                                     |                  |                      |                |

**Telepharmacy versus Face-to-Face Approach in Providing Inhaler Technique Training Service: A Non-inferiority Assessment Among German Pharmacy Students**

**Supplementary Materials**

|                                                                                                                                                                                                        |           |               |         |
|--------------------------------------------------------------------------------------------------------------------------------------------------------------------------------------------------------|-----------|---------------|---------|
| 2.11 The examinee provides additional information (rinsing mouth, brushing teeth, drinking water, repeating all the steps in case of an additional dose, and storage of the device).                   |           |               |         |
| 2.12 The examinee asks the patient to demonstrate all the steps.                                                                                                                                       |           |               |         |
| <b>Station 3: Communication skills, critical error identification &amp; documentation (8 P.)</b>                                                                                                       |           |               |         |
|                                                                                                                                                                                                        | Fulfilled | Not fulfilled | Remarks |
| 3.1 The examinee maintains sufficient eye contact during the counseling session.                                                                                                                       |           |               |         |
| 3.2 The examinee pays attention to appropriate non-verbal communication (gestures, facial expressions, etc.).                                                                                          |           |               |         |
| 3.3 The examinee pays attention to comprehensible expression.                                                                                                                                          |           |               |         |
| 3.4 The examinee ensures the patient's understanding.                                                                                                                                                  |           |               |         |
| 3.5 The examinee remains attentive during the inhaler technique demonstration by the patient.                                                                                                          |           |               |         |
| 3.6 The examinee responds to critical inhaler technique errors made by the patient. <ul style="list-style-type: none"> <li>• No "loading" of the diskus.</li> <li>• Exhale into the device.</li> </ul> |           |               |         |
| 3.7 The examinee responds to the patient's questions.                                                                                                                                                  |           |               |         |
| 3.8 The examinee completes the necessary documentation.                                                                                                                                                |           |               |         |

**Supplementary material S5. Analytical Checklist for Inhaler type Elpenhaler**

Participant code: \_\_\_\_\_ Date: \_\_\_\_\_ Examiner: \_\_\_\_\_

OSCE-Nr. \_\_\_\_ Communication medium: Face-2-Face  Telepharmacy

| <b>OSCE Checklist (Elpenhaler)</b>                                                                                                                                                                                                  |           |               |         |
|-------------------------------------------------------------------------------------------------------------------------------------------------------------------------------------------------------------------------------------|-----------|---------------|---------|
| <b>Steps to be carried out and checked</b>                                                                                                                                                                                          | Fulfilled | Not fulfilled | Remarks |
| <b>Station 1: General Preparation and Introduction (5 P.)</b>                                                                                                                                                                       |           |               |         |
| 1.1 The examinee greets and identifies the patient.                                                                                                                                                                                 |           |               |         |
| 1.2 The examinee checks whether the patient is eligible for the clinical pharmacy service (Inhaler technique training). <ul style="list-style-type: none"> <li>• <i>Newly prescribed</i></li> <li>• <i>Device change</i></li> </ul> |           |               |         |

**Telepharmacy versus Face-to-Face Approach in Providing Inhaler Technique Training Service: A Non-inferiority Assessment Among German Pharmacy Students**

**Supplementary Materials**

|                                                                                                                                                                                      |           |               |         |
|--------------------------------------------------------------------------------------------------------------------------------------------------------------------------------------|-----------|---------------|---------|
| <ul style="list-style-type: none"> <li><i>Last training ≥ 1 year ago and no participation in the Disease-Management-Programm (DMP)</i></li> </ul>                                    |           |               |         |
| 1.3 The examinee obtains the patient's consent.                                                                                                                                      |           |               |         |
| 1.4 The examinee explains the stepwise procedure.                                                                                                                                    |           |               |         |
| 1.5 The examinee explains the importance of the correct inhaler technique.                                                                                                           |           |               |         |
| <b>Station 2: Inhaler technique demonstration and practice (13 P.)</b>                                                                                                               |           |               |         |
| The examinee instructs the patient by demonstrating how to.....                                                                                                                      | Fulfilled | Not fulfilled | Remarks |
| 2.1 ... verify the condition of the inhaler (Functionality, completeness, cleanliness).                                                                                              |           |               |         |
| 2.2 ... remove the cap of the inhaler.                                                                                                                                               |           |               |         |
| 2.3 ... set the device ready for use (Take out the blister from the package and insert it correctly into the device).                                                                |           |               |         |
| 2.4...Prepare the dose by pulling off the overhanging end.                                                                                                                           |           |               |         |
| 2.5 ...hold the device and maintain body posture in the correct position (standing or sitting straight).                                                                             |           |               |         |
| 2.6 ... exhale completely sideways.                                                                                                                                                  |           |               |         |
| 2.7 ... Put the mouthpiece between the teeth, close the lips to form a good seal, and keep the head upright.                                                                         |           |               |         |
| 2.8 ... Inhale deeply and rapidly                                                                                                                                                    |           |               |         |
| 2.9 ... hold breath for 5-10 seconds after inhalation.                                                                                                                               |           |               |         |
| 2.10 ... slowly exhale from the mouth or nose and away from the mouthpiece.                                                                                                          |           |               |         |
| 2.11 ... remove the empty blister and close the device.                                                                                                                              |           |               |         |
| 2.12 The examinee provides additional information (rinsing mouth, brushing teeth, drinking water, repeating all the steps in case of an additional dose, and storage of the device). |           |               |         |
| 2.13 The examinee asks the patient to demonstrate all the steps.                                                                                                                     |           |               |         |
| <b>Station 3: Communication skills, critical error identification &amp; documentation (8 P.)</b>                                                                                     |           |               |         |
|                                                                                                                                                                                      | Fulfilled | Not fulfilled | Remarks |
| 3.1 The examinee maintains sufficient eye contact during the counseling session.                                                                                                     |           |               |         |
| 3.2 The examinee pays attention to appropriate non-verbal communication (gestures, facial expressions, etc.).                                                                        |           |               |         |

**Telepharmacy versus Face-to-Face Approach in Providing Inhaler Technique Training Service: A Non-inferiority Assessment Among German Pharmacy Students**

**Supplementary Materials**

|                                                                                                                                                                                                  |  |  |  |
|--------------------------------------------------------------------------------------------------------------------------------------------------------------------------------------------------|--|--|--|
| 3.3 The examinee pays attention to comprehensible expression.                                                                                                                                    |  |  |  |
| 3.4 The examinee ensures the patient's understanding.                                                                                                                                            |  |  |  |
| 3.5 The examinee remains attentive during the inhaler technique demonstration by the patient.                                                                                                    |  |  |  |
| 3.6 The examinee responds to critical inhaler technique errors made by the patient. <ul style="list-style-type: none"> <li>• Exhaling into the device.</li> <li>• Not holding breath.</li> </ul> |  |  |  |
| 3.7 The examinee responds to the patient's questions.                                                                                                                                            |  |  |  |
| 3.8 The examinee completes the necessary documentation.                                                                                                                                          |  |  |  |

**Supplementary material S6. Analytical Checklist for Inhaler type Novolizer**

Participant code: \_\_\_\_\_ Date: \_\_\_\_\_ Examiner: \_\_\_\_\_

OSCE-Nr. \_\_\_\_ Communication medium: Face-2-Face  Telepharmacy

| <b>OSCE Checklist (Novolizer)</b>                                                                                                                                                                                                                                                                                                              |                  |                      |                |
|------------------------------------------------------------------------------------------------------------------------------------------------------------------------------------------------------------------------------------------------------------------------------------------------------------------------------------------------|------------------|----------------------|----------------|
| <b>Steps to be carried out and checked</b>                                                                                                                                                                                                                                                                                                     | <b>Fulfilled</b> | <b>Not fulfilled</b> | <b>Remarks</b> |
| <b>Station 1: General Preparation and Introduction (5 P.)</b>                                                                                                                                                                                                                                                                                  |                  |                      |                |
| 1.1 The examinee greets and identifies the patient.                                                                                                                                                                                                                                                                                            |                  |                      |                |
| 1.2 The examinee checks whether the patient is eligible for the clinical pharmacy service (Inhaler technique training). <ul style="list-style-type: none"> <li>• <i>Newly prescribed</i></li> <li>• <i>Device change</i></li> <li>• <i>Last training ≥ 1 year ago and no participation in the Disease-Management-Programm (DMP)</i></li> </ul> |                  |                      |                |
| 1.3 The examinee obtains the patient's consent.                                                                                                                                                                                                                                                                                                |                  |                      |                |
| 1.4 The examinee explains the stepwise procedure.                                                                                                                                                                                                                                                                                              |                  |                      |                |
| 1.5 The examinee explains the importance of the correct inhaler technique.                                                                                                                                                                                                                                                                     |                  |                      |                |
| <b>Station 2: Inhaler technique demonstration and practice (12 P.)</b>                                                                                                                                                                                                                                                                         |                  |                      |                |
| The examinee instructs the patient by demonstrating how to.....                                                                                                                                                                                                                                                                                | <b>Fulfilled</b> | <b>Not fulfilled</b> | <b>Remarks</b> |
| 2.1 ... verify the condition of the inhaler (Functionality, completeness, cleanliness).                                                                                                                                                                                                                                                        |                  |                      |                |
| 2.2 ... remove the cap of the inhaler.                                                                                                                                                                                                                                                                                                         |                  |                      |                |

**Telepharmacy versus Face-to-Face Approach in Providing Inhaler Technique Training Service: A Non-inferiority Assessment Among German Pharmacy Students**

**Supplementary Materials**

|                                                                                                                                                                                                        |           |               |         |
|--------------------------------------------------------------------------------------------------------------------------------------------------------------------------------------------------------|-----------|---------------|---------|
| 2.3 ... set the device ready for use (press the lever down until it clicks).                                                                                                                           |           |               |         |
| 2.4 ...hold the device and maintain body posture in the correct position (standing or sitting straight).                                                                                               |           |               |         |
| 2.5 ... exhale completely sideways.                                                                                                                                                                    |           |               |         |
| 2.6 ... Put the mouthpiece between the teeth, close the lips to form a good seal, and keep the head upright.                                                                                           |           |               |         |
| 2.7 ... Inhale deeply and rapidly, and for a long time                                                                                                                                                 |           |               |         |
| 2.8 ... hold breath for 5-10 seconds after inhalation.                                                                                                                                                 |           |               |         |
| 2.9 ... slowly exhale from the mouth or nose and away from the mouthpiece.                                                                                                                             |           |               |         |
| 2.10 ... close the device.                                                                                                                                                                             |           |               |         |
| 2.11 The examinee provides additional information (rinsing mouth, brushing teeth, drinking water, repeating all the steps in case of an additional dose, and storage of the device).                   |           |               |         |
| 2.12 The examinee asks the patient to demonstrate all the steps.                                                                                                                                       |           |               |         |
| <b>Station 3: Communication skills, critical error identification &amp; documentation (8 P.)</b>                                                                                                       |           |               |         |
|                                                                                                                                                                                                        | Fulfilled | Not fulfilled | Remarks |
| 3.1 The examinee maintains sufficient eye contact during the counseling session.                                                                                                                       |           |               |         |
| 3.2 The examinee pays attention to appropriate non-verbal communication (gestures, facial expressions, etc.).                                                                                          |           |               |         |
| 3.3 The examinee pays attention to comprehensible expression.                                                                                                                                          |           |               |         |
| 3.4 The examinee ensures the patient's understanding.                                                                                                                                                  |           |               |         |
| 3.5 The examinee remains attentive during the inhaler technique demonstration by the patient.                                                                                                          |           |               |         |
| 3.6 The examinee responds to critical inhaler technique errors made by the patient. <ul style="list-style-type: none"> <li>• Shaking the Novolizer.</li> <li>• Not "loading" the Novolizer.</li> </ul> |           |               |         |
| 3.7 The examinee responds to the patient's questions.                                                                                                                                                  |           |               |         |
| 3.8 The examinee completes the necessary documentation.                                                                                                                                                |           |               |         |

**Telepharmacy versus Face-to-Face Approach in Providing Inhaler Technique Training Service: A Non-inferiority Assessment Among German Pharmacy Students**

**Supplementary Materials**

**Supplementary Table 1. Responses to the perception survey**

| <b>Statements</b>                                                                                                                   | <b>% Agreement</b> | <b>% Disagreement</b> | <b>Mean (SD)</b> | <b>Median</b> |
|-------------------------------------------------------------------------------------------------------------------------------------|--------------------|-----------------------|------------------|---------------|
| I see Telepharmacy as another option for patient consultations in the future.                                                       | 100                | 0                     | 5.25<br>(0.75)   | 5             |
| Telepharmacy consultation is time-consuming.                                                                                        | 20.5               | 79.5                  | 2.72<br>(0.91)   | 3             |
| Telepharmacy consultation is future-oriented.                                                                                       | 92.3               | 7.7                   | 4.74<br>(0.96)   | 5             |
| Telepharmacy is a suitable approach for demonstrating and practicing the correct inhaler technique.                                 | 92.3               | 7.7                   | 4.56<br>(0.88)   | 4             |
| Telepharmacy is a good alternative to face-to-face consultations for demonstrating and practicing the correct inhaler technique.    | 82.1               | 17.9                  | 4.38<br>(1.06)   | 4             |
| I found the Telepharmacy approach more difficult than the face-to-face approach while providing inhaler technique training service. | 51.3               | 48.7                  | 3.64<br>(1.24)   | 4             |
| I noticed a difference in my verbal communication (e.g. voice tone, volume, etc.) between the two simulation sessions.              | 82.1               | 17.9                  | 4.28<br>(1.29)   | 5             |
| I noticed a difference in my non-verbal communication (e.g. eye contact, body language, etc.) between the two simulation sessions.  | 69.2               | 30.8                  | 4.53<br>(1.07)   | 5             |
| I noticed a difference in patient interaction between the two simulation sessions.                                                  | 64.1               | 35.9                  | 4.10<br>(1.33)   | 4             |
| The simulation gave me an insight into telepharmacy consultations.                                                                  | 100                | 0                     | 5.20<br>(0.65)   | 5             |

**Note:** Responses were rated on a six-point Likert scale (1 = strongly disagree, 2 = disagree, 3 = rather disagree, 4 = rather agree, 5 = agree, 6 = strongly agree); strongly disagree, disagree and rather disagree= disagreement; rather agree, agree, and strongly agree= Agreement.
